# Supplementary material for: Ultrasensitive sensing of tris(2,3-dibromopropyl) isocyanurate based on the synergistic effect of amino and hydroxyl groups of a molecularly imprinted poly(o-aminophenol) film
Source: Royal Society of Chemistry journal article supplement (doi:10.1039/c5nj02031j), 2015-12-01
Supplement: c5nj02031j1.pdf [file c5nj02031j1.pdf]

Electronic Supplementary Information for *New Journal of Chemistry*:

**Ultrasensitive sensing tris (2, 3-dibromopropyl) isocyanurate based on the synergistic effect of amino and hydroxyl groups of molecularly imprinted poly (*o*-aminophenol) film**

Xiuling Ma,<sup>a</sup> Jiaxiang Liu,<sup>a</sup> Dan Wu,<sup>a</sup> Lihua Wang,<sup>a\*</sup> Zhangjing Zhang<sup>a</sup> and Shengchang Xiang<sup>a, b\*</sup>

<sup>a</sup>*College of Chemistry and Chemical Engineering, Fujian Provincial Key Laboratory of Polymer Materials, Fujian Normal University, Fuzhou, Fujian, 350007, China.*

<sup>b</sup>*College of Life and Environmental Sciences, Minzu University of China, Beijing 100081, China.*

*E-mail: scxiang@fjnu.edu.cn, lhwang@fjnu.edu.cn*

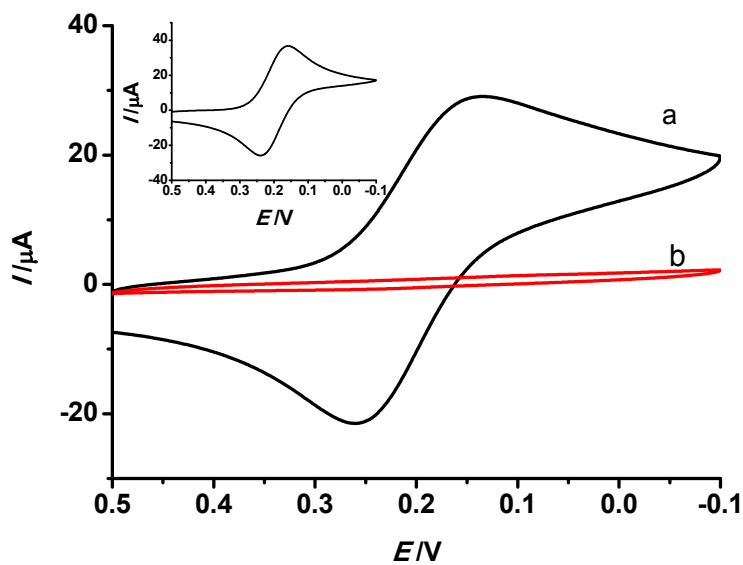

**Figure S1.** CV of different electrodes (a: MIP sensor; b: NIP sensor; inset: bared electrode)

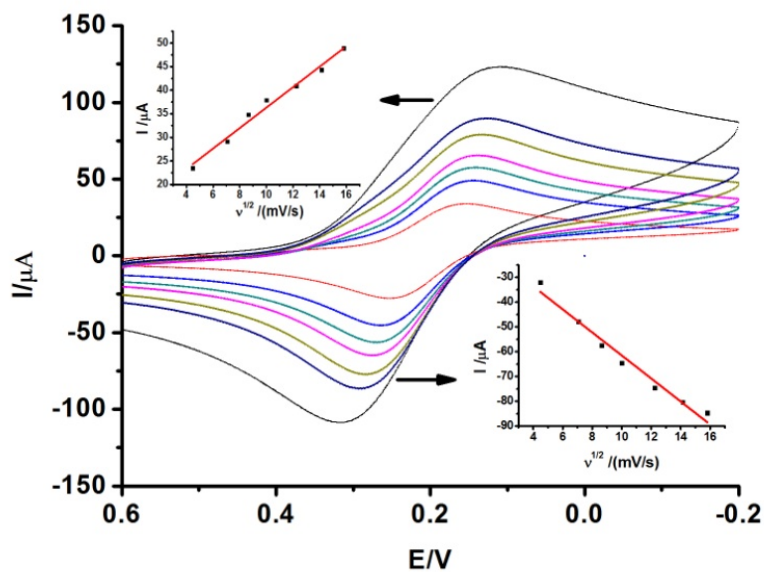

**Figure S2.** CV of the imprinted OAP sensor in  $K_3[Fe(CN)_6]$  solution at different scanning speeds (from inside to outside: 20, 50, 75, 100, 150, 200, 250 mV/s; inset shows the linear relation of  $I_p - v^{1/2}$ )

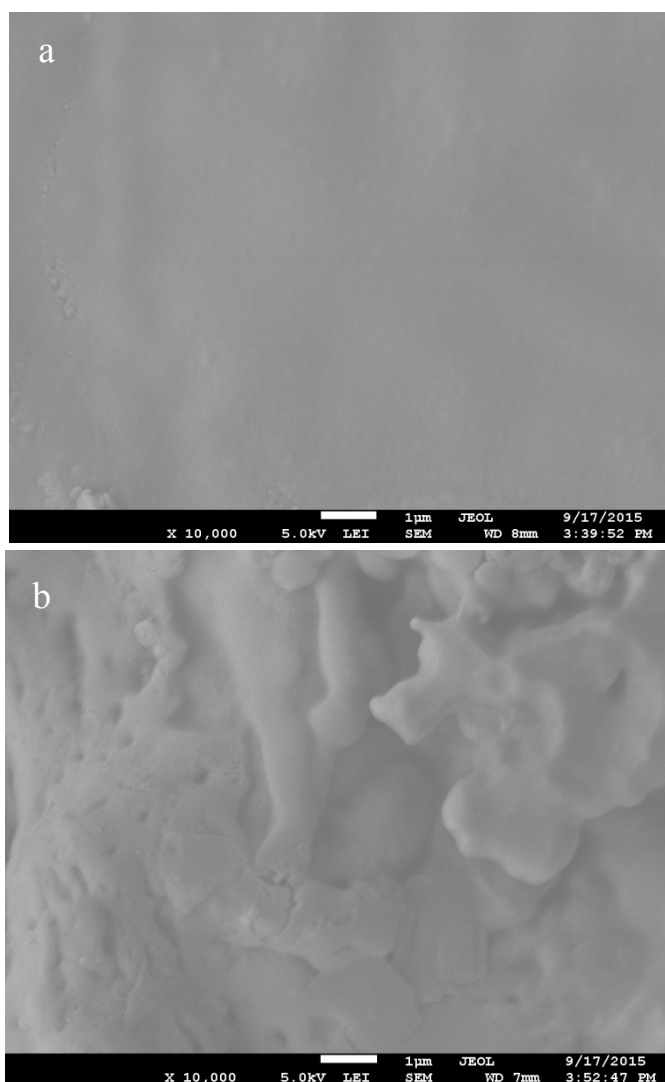

**Figure S3.** SEM photographs (a): MIP sensor before elution r, (b): MIP sensor after elution using aniline as functional monomer.

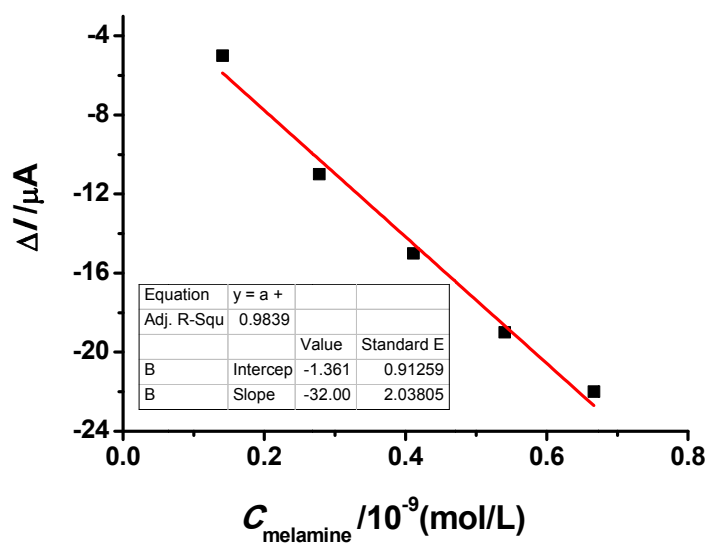

**Figure S4.** The linear relation of  $\Delta I \sim C_{\text{melamine}}$
